# Supplementary material for: Heat stress promotes Arabidopsis AGO1 phase separation and association with stress granule components
Source: PubMed Central journal article supplement (PMC10879784; doi:10.1016/j.isci.2024.109151), 2024-02-06
Supplement: mmc1.pdf [file mmc1.pdf]

**Supplemental information**

**Heat stress promotes Arabidopsis AGO1 phase**

**separation and association with stress**

**granule components**

**Aleksandar Blagojevic, Patricia Baldrich, Marlene Schiaffini, Esther Lechner, Nicolas Baumberger, Philippe Hammann, Taline Elmayan, Damien Garcia, Hervé Vaucheret, Blake C. Meyers, and Pascal Genschik**

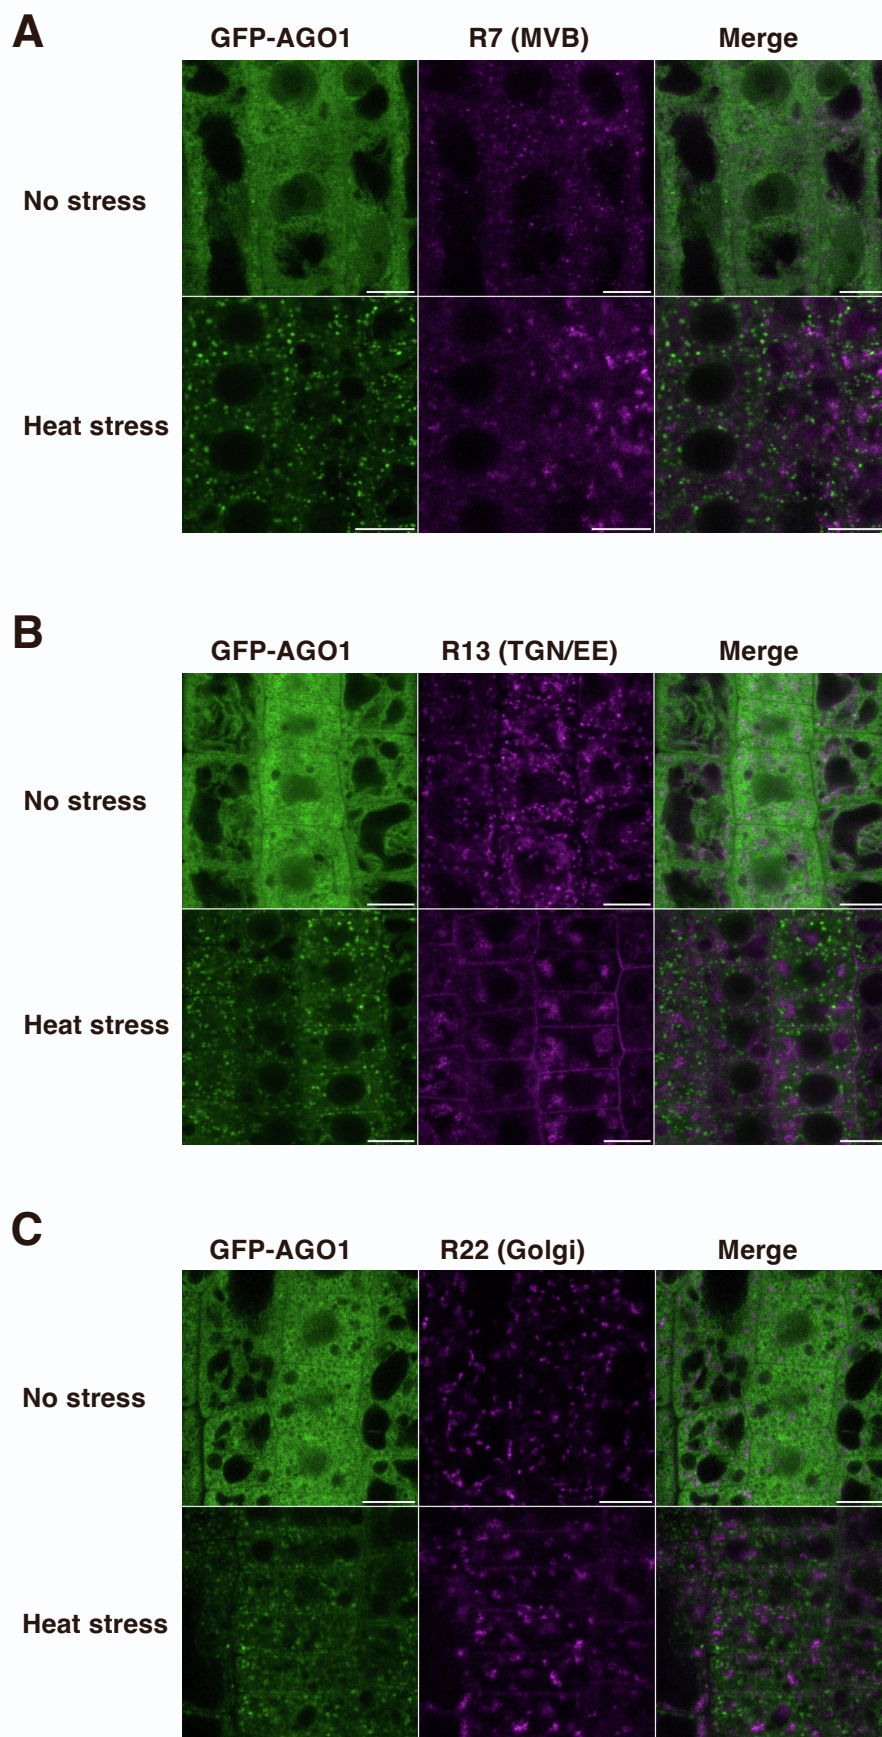

Figure S1

**Fig. S1 Dual subcellular localization of AGO1 with different cytoplasmic compartment markers.**

**(A)** AGO1 does not colocalize with the MVB marker R7 in root tip cells. See also Table S1 and the STAR Methods section. CLSM on 5-day old Arabidopsis pAGO1:GFP-AGO1 *ago1-27* x pUB10:mCherry-Rha1/RabF2a (R7) root tip cells before and after 37°C HS of 30 minutes. Experiments were performed in triplicate with three roots per replicate. Data are represented as mean +/- SME. Bar = 10  $\mu$ m.

Foci number before HS for R7 =  $1451 \pm 109$ ; PCC=  $0.34 \pm 0.04$

Foci number after HS for R7 =  $1049 \pm 104$ ; PCC=  $0.29 \pm 0.05$

Foci number after HS for GFP-AGO1 =  $1525 \pm 168$ ; PCC=  $0.19 \pm 0.03$

**(B)** AGO1 does not colocalize with the TGN/EE marker R13 in root tip cells. See also Table S1 and the STAR Methods section. CLSM on 5 day old Arabidopsis pAGO1:GFP-AGO1 *ago1-27* x pUB10:mCherry-VTI12 (R13) root tip cells. Before and after 37°C HS of 30 minutes. Experiments were performed in triplicate with three roots per replicate. Data are represented as mean +/- SME. Bar = 10  $\mu$ m.

Foci number before HS for R13 =  $1311 \pm 169$ ; PCC=  $0.12 \pm 0.06$

Foci number after HS for R13 =  $553 \pm 125$ ; PCC=  $0.07 \pm 0.03$

Foci number after HS for GFP-AGO1 =  $1370 \pm 155$ ; PCC=  $0.04 \pm 0.03$

**(C)** AGO1 does not colocalize with the Golgi marker R22 in root tip cells. See also Table S1 and the STAR Methods section. CLSM on 5 day old Arabidopsis pAGO1:GFP-AGO1 *ago1-27* x pUB10:mCherry-SYP22 (R22) root tip cells before and after 37°C HS of 30 minutes. Experiments were performed in triplicate with three roots per replicate. Data are represented as mean +/- SME. Bar = 10  $\mu$ m.

Foci number before HS for R22 =  $1355 \pm 169$ ; PCC=  $0.47 \pm 0.04$

Foci number after HS for R22 =  $662 \pm 120$ ; PCC=  $0.28 \pm 0.06$

Foci number after HS for GFP-AGO1 =  $1157 \pm 250$ ; PCC=  $0.27 \pm 0.05$

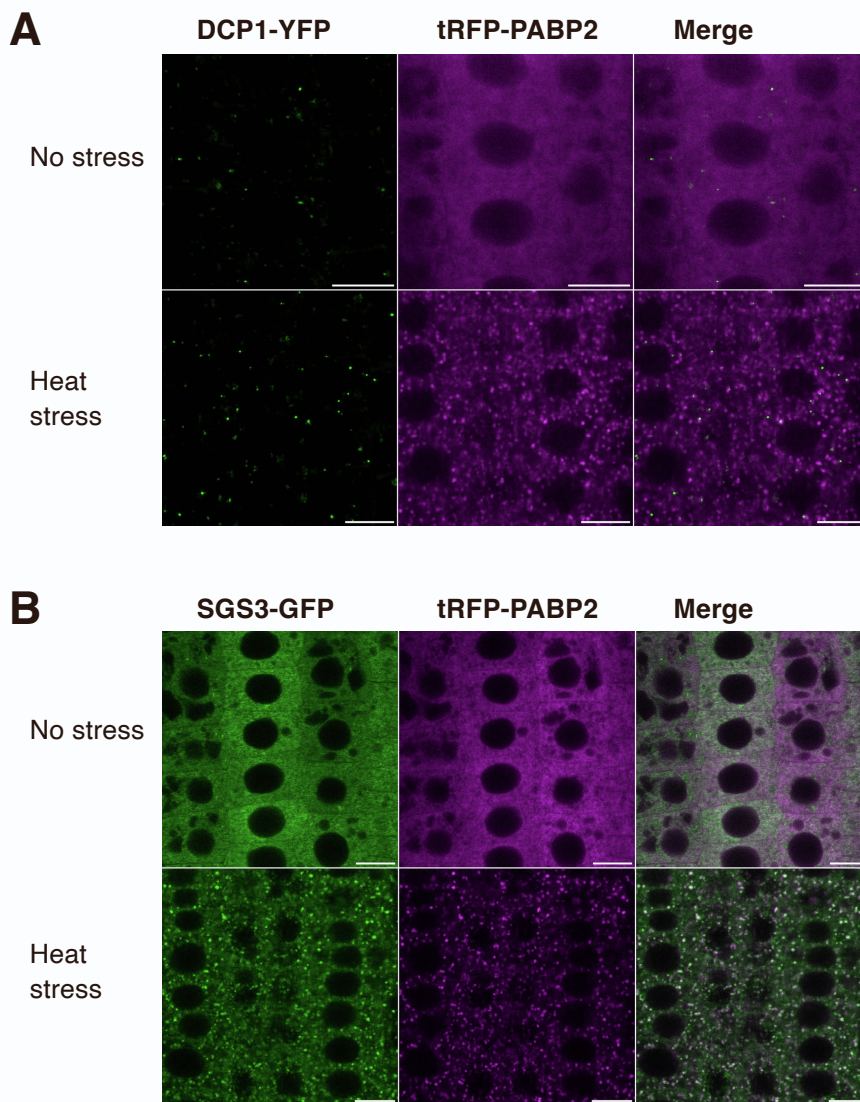

**Fig. S2 The stress granule marker PAB2 colocalizes in foci with SGS3, but not DCP1 under HS.**

**(A)** CLSM imaging of 5 day old Arabidopsis pDCP1:DCP1-YFP *dcp1-3* x pPABP2:tRFP-PABP2 root tip cells before and after 37°C HS of 30 minutes. See also Table S1 and the STAR Methods section. Experiments were performed in triplicate with three roots per replicate. Data are represented as mean +/- SME. Bar = 10  $\mu$ m. Objective 40X, oil immersion.

Foci number before HS for DCP1-YFP =  $1300 \pm 153$ ; PCC=  $0.15 \pm 0.03$

Foci number after HS for DCP1-YFP =  $478 \pm 50$ ; PCC=  $0.06 \pm 0.05$

Foci number after HS for tRFP-PABP2 =  $1666 \pm 132$ ; PCC=  $0.34 \pm 0.04$

**(B)** CLSM imaging of 5 day old Arabidopsis pRDR6:SGS3-GFP x pPABP2:tRFP-PABP2 root tip cells before and after 37°C HS of 30 minutes. See also Table S1 and related to Figure 1F. Experiments were performed in triplicate with three roots per replicate. Data are represented as mean +/- SME. Bar = 10  $\mu$ m.

Foci number after HS for SGS3-GFP =  $1385 \pm 156$ ; PCC=  $0.84 \pm 0.01$

Foci number after HS for tagRFP-PABP2 =  $2152 \pm 227$ ; PCC=  $0.85 \pm 0.01$

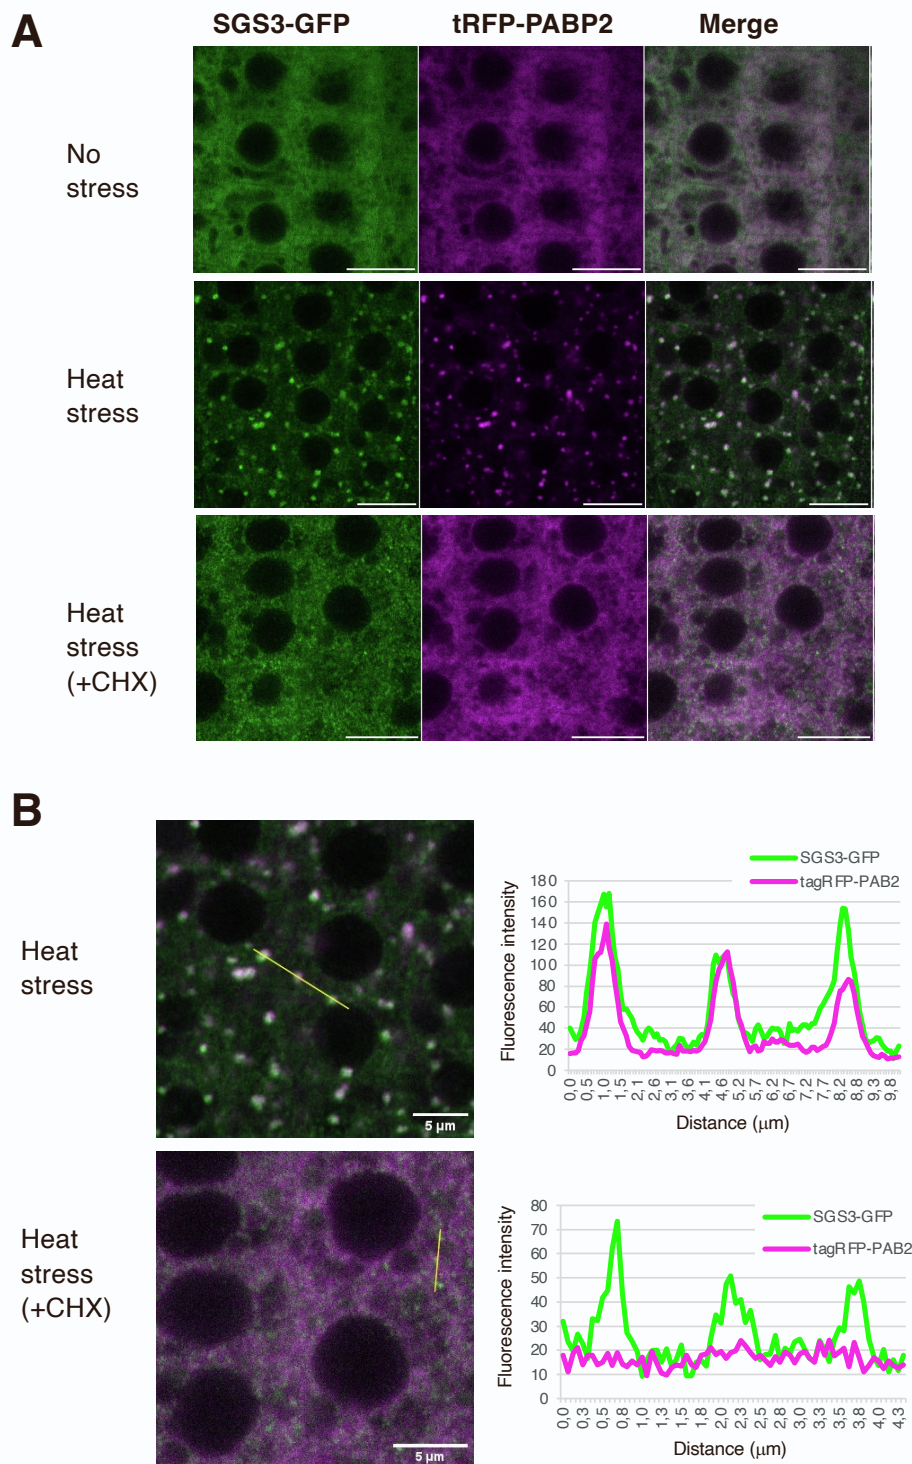

**Fig. S3 Cycloheximide inhibits stress granule formation, but not small SGS3 foci.**

(A) CLSM imaging of 5 day old Arabidopsis pRDR6:SGS3-GFP x pPABP2:tRFP-PABP2 root tip cells before HS (upper panels), after 37°C HS of 30 minutes (middle panels) and after 37°C HS of 30 minutes in the presence of 100µM CHX). Experiment performed in duplicate with three roots per replicate. Bar = 10 µm. Related to Fig. S2B and Fig.2 and see also Table S1.

(B) Signal intensity distribution of the total amount of pixels at the x axis shown in the CHX-untreated and CHX-treated cells after 30 minutes of HS at 37°C shown in A. Scale bar = 5 µm. Three independent roots were analyzed. For each of these roots, a selected area of a square of 15 µm side was defined in which 3 different measurements of PCC were performed. Data are represented as mean +/- SEM. For non CHX-treated plants (PC= 0.84 ± 0.01) and for CHX-treated plants (PC= 0.26 ± 0.05).

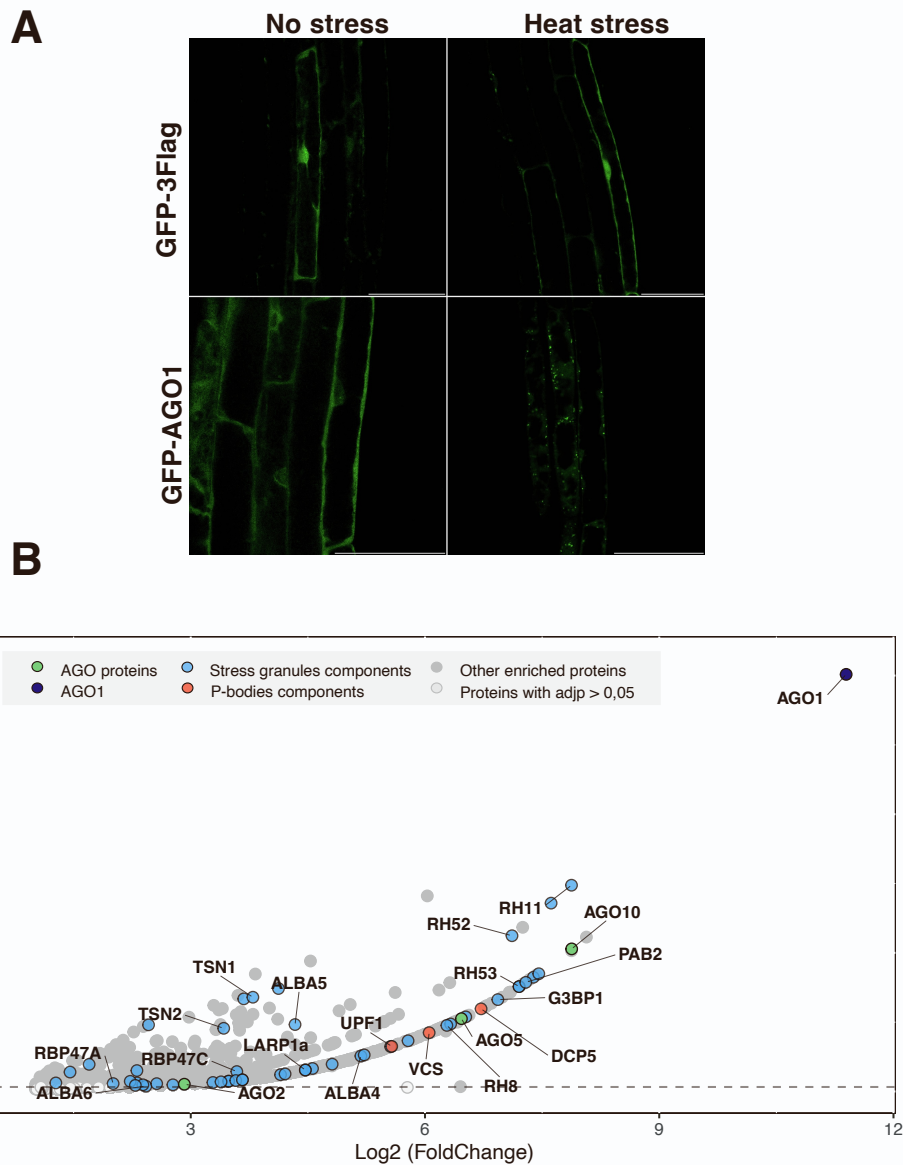

**Fig. S4 AGO1 interactome revealed by immunoprecipitation and mass spectrometry**

(A) CLSM imaging of 7 day old Arabidopsis root tip cells of pAGO1:GFP-AGO1 and p35S:GFP-3Flag transgenic lines before and after 37°C HS of 1 hr. Bar = 50  $\mu$ m Objective 40X, oil immersion.

(B) Volcano plot showing the enrichment during HS of proteins co-purified with the GFP-AGO1 bait compared with GFP alone as control. We compared 9 samples (pAGO1:GFP-AGO1 *ago1-27*) from 3 independent biological replicates to 9 control samples p35S:GFP-3Flag seedlings subjected to 1 hr HS at 37°C. The y and x axes display log<sub>2</sub> values from adjusted p values and fold changes, respectively. The horizontal dashed line indicates the threshold above which proteins are significantly enriched (adjusted p values < 0.05). Only AGO1-enriched proteins (log<sub>2</sub>FC > 1) are shown. Three color-coded functional clusters are highlighted. Enriched proteins are dark grey, cytoplasmic RNA granules related proteins are highlighted in blue, AGO proteins are in green, selected P-bodies markers are in red. The source data are available in Table S2. Related to Fig. 3A.

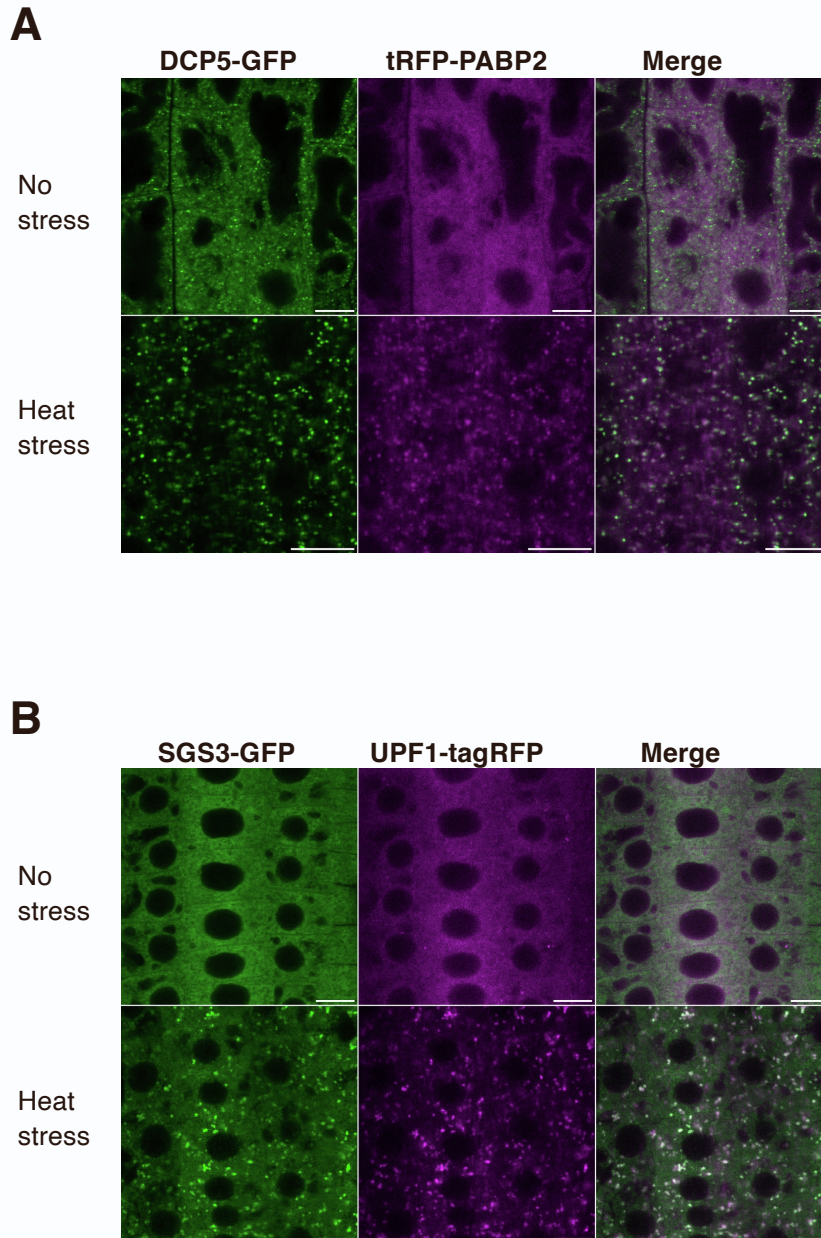

**Fig. S5 DCP5/PAB2 and SGS3/UPF1 colocalization during HS.**

**(A)** DCP5 colocalizes with PAB2 in foci under heat-stressed conditions. Confocal laser scanning microscopy on 5 day old Arabidopsis pUB10:DCP5g-GFP *dcp5-1* x pPABP2:tRFP-PABP2 root tip cells before and after 37°C HS of 30 minutes. Experiments were performed in triplicate with three roots per replicate. Data are represented as mean +/- SME. Bar = 10  $\mu$ m. See also Table S1 and related to Fig. 3B.

Foci number after HS for DCP5-GFP =  $479 \pm 45$ ; PCC=  $0.67 \pm 0.04$

Foci number after HS for tRFP-PABP2 =  $400 \pm 13$ ; PCC=  $0.61 \pm 0.04$

**(B)** SGS3 colocalizes with UPF1 in foci under heat-stressed conditions. Confocal laser scanning microscopy on 5 day old Arabidopsis pRDR6:SGS3-GFP x pUPF1:UPF1g-tagRFP *upf1-5* root tip cells before and after 37°C HS of 30 minutes. Experiments were performed in triplicate with three roots per replicate. Data are represented as mean +/- SME. Bar = 10  $\mu$ m. See also Table S1 and related to Fig. 3C.

Foci number after HS for SGS3-GFP =  $1498 \pm 226$ ; PCC=  $0.77 \pm 0.01$

Foci number after HS for UPF1-tagRFP=  $1602 \pm 217$ ; PCC=  $0.77 \pm 0.02$

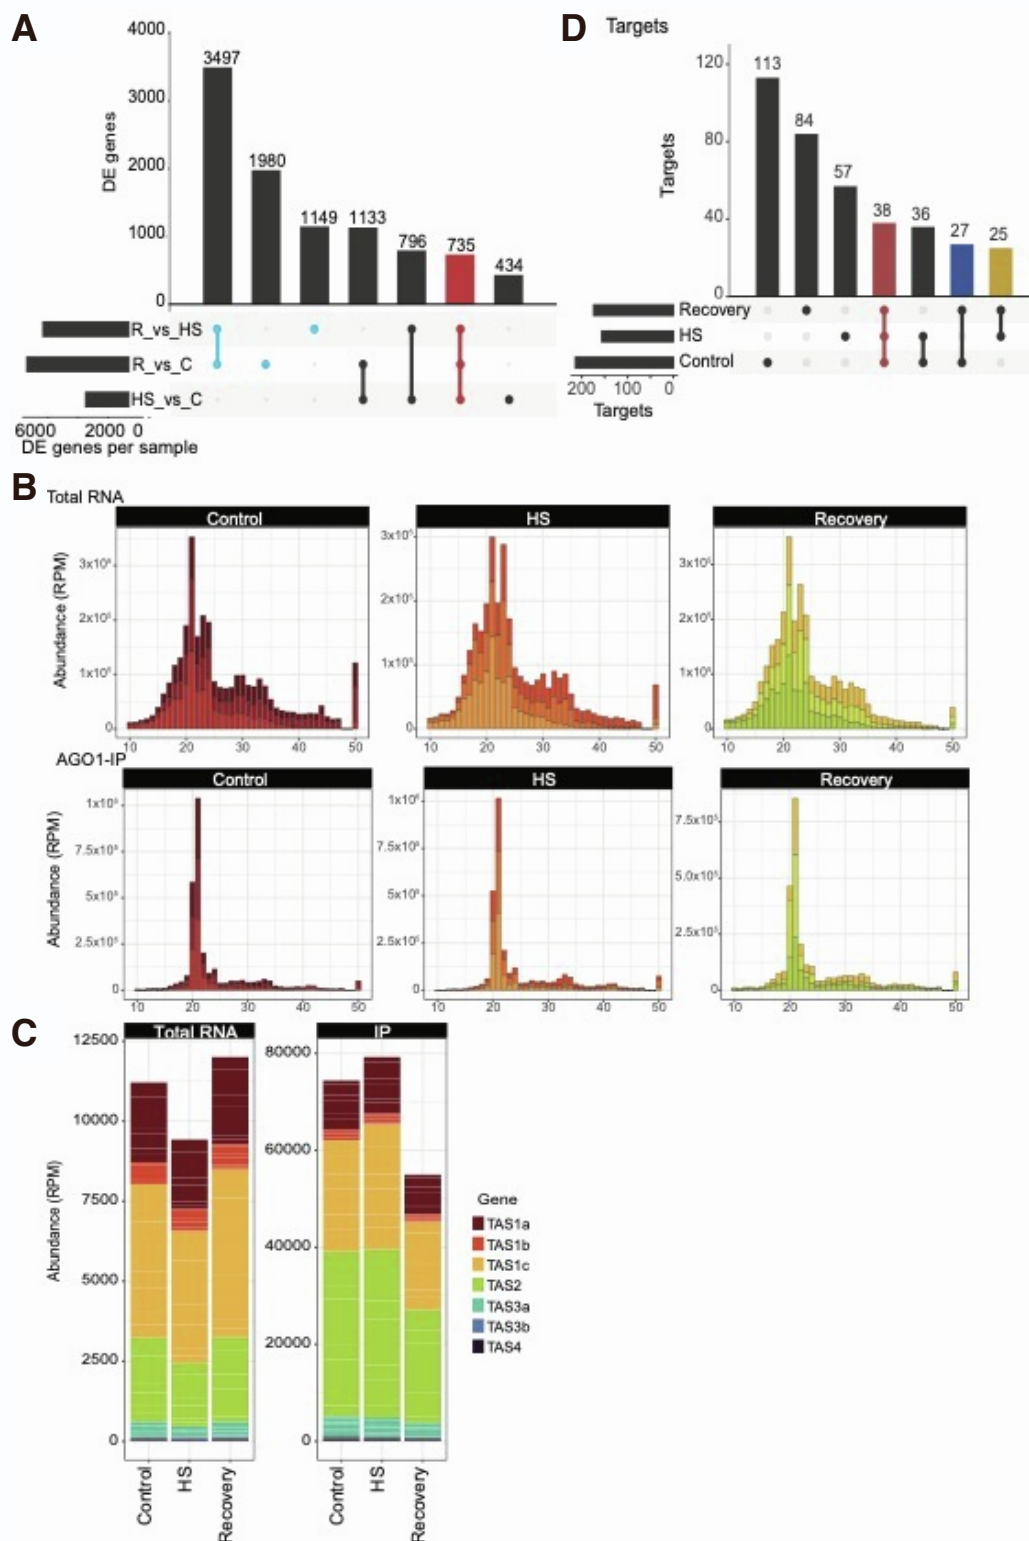

**Fig. S6 Differentially expressed coding genes and sRNA accumulation during HS and recovery**

(A) Upset plot representing statistically significant differentially expressed (DE) genes between all three comparisons. See also Fig. 4A.

(B) Size distribution of sRNAs mapping to the Arabidopsis genome (TAIR version 10). The abundance of each size class was normalized to reads per million (RPM) for each library. The x-axis indicates the sRNA size and the y-axis its abundance in RPM-mapped reads. Shown are data from three independent biological replicates, for total RNA (upper panel) and AGO1-IP (lower panel). Related to Fig. 4B.

(C) Abundance of each TAS gene in Total RNA (left panel) and AGO1-IP (right panel). The x-axis represents the sample type, and the y-axis represents the abundance of sRNAs mapping each TAS gene. The three biological replicates for each treatment are plotted and stacked together. Each TAS gene is represented with a different color.

(D) Upset plot representing the miRNA targets identified by nanoPARE sequencing in each of the treatments. For each upset plot, the bottom left shows the number of differentially expressed genes in each comparison as a horizontal histogram, the bottom right shows the intersection matrix and the upper right shows the size of each combination as a vertical histogram. The red line marks differentially expressed genes common to all three comparisons, the blue lines mark differentially expressed genes during the recovery process. Related to Fig. 4D.



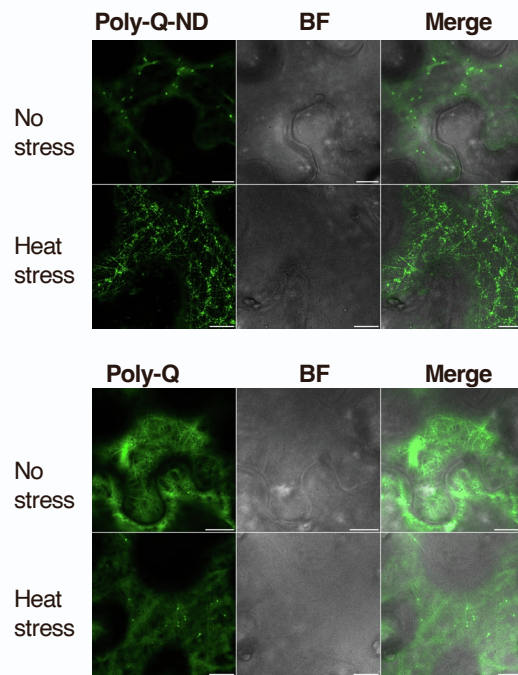

**Fig. S7 The Poly-Q domain alone undergoes LLPS in plant cells under HS.**

Representative CLSM imaging of *N. benthamiana* leaf epidermal cells transiently expressing GFP-Poly-Q-ND and GFP-Poly-Q proteins in the absence or presence of HS (30 minutes at 37°C). Bar = 10  $\mu$ m. Objective 40X, oil immersion. BF, bright field. Related to Fig. 5A and Fig. 5C.

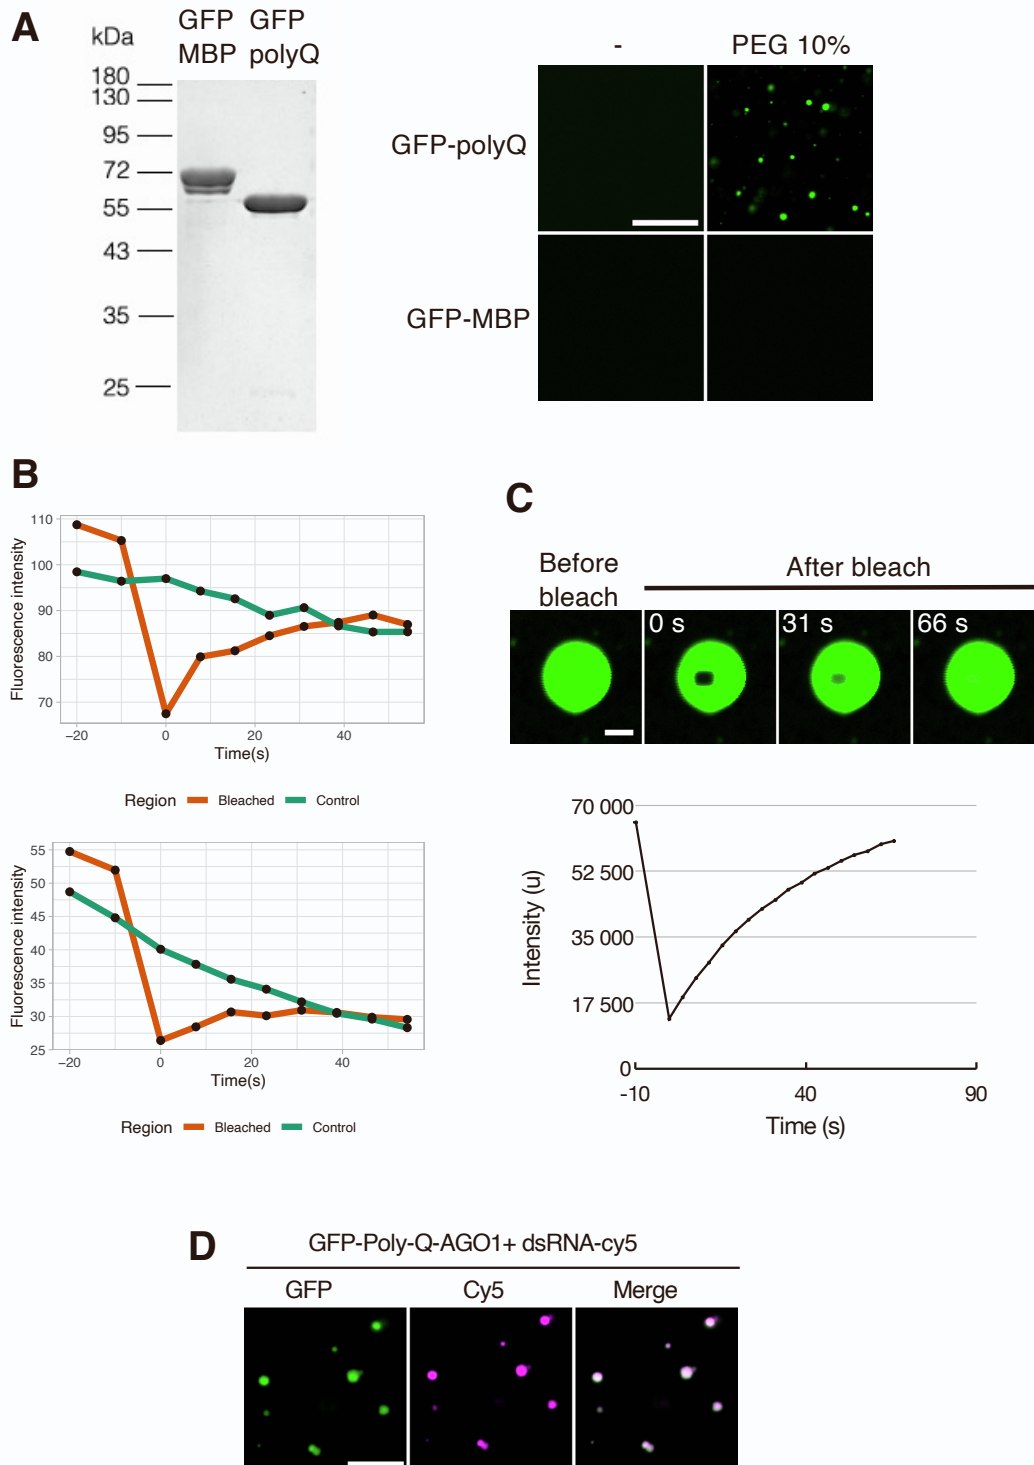

**Fig. S8 The Poly-Q domain of AGO1 alone undergoes LLPS and colocalizes with RNA *in vitro***

**(A)** The Poly-Q domain of AGO1, but not maltose binding protein fused to GFP form droplets *in vitro*.

Left panel: SDS-PAGE analysis of the recombinant proteins GFP-polyQ and GFP-MBP used in *in vitro* LLPS assays and EMSA assays. 2,5ug per lane of 12% Tris-glycine SDS-PAGE. Right panel: *In vitro* analysis of droplet formation by recombinant GFP-polyQ protein and control protein GFP-MBP protein at 200mM NaCl concentration in 25mM HEPES pH7.5, 10% PEG 8000. Protein concentration is 4 $\mu$ M. Bar = 20 $\mu$ m. Objective 20X. Related to Fig. 5D.

**(B)** Two more biological replicates of FRAP assays of pAGO1:GFP-AGO1 *ago1-27* Arabidopsis root tip cells subjected to HS as shown in Fig. 5E.

**(C)** *In vitro* FRAP analysis of GFP-Poly-Q droplets. Time 0 is set at the photobleaching pulse. Data are representative of four independent experiments. Bar = 2 $\mu$ m. At the bottom, recovery data corresponding to images displayed in the upper part. Related to Fig. 5E.

**(D)** Colocalization of GFP-Poly-Q protein with Cy5 labelled-dsRNAs upon droplet formation in 25mM HEPES buffer pH7.5, 200mM NaCl, 10% PEG8000. Protein and RNAs are at 4 $\mu$ M. Bar = 10 $\mu$ m. Objective 40X. Related to Fig. 5G.

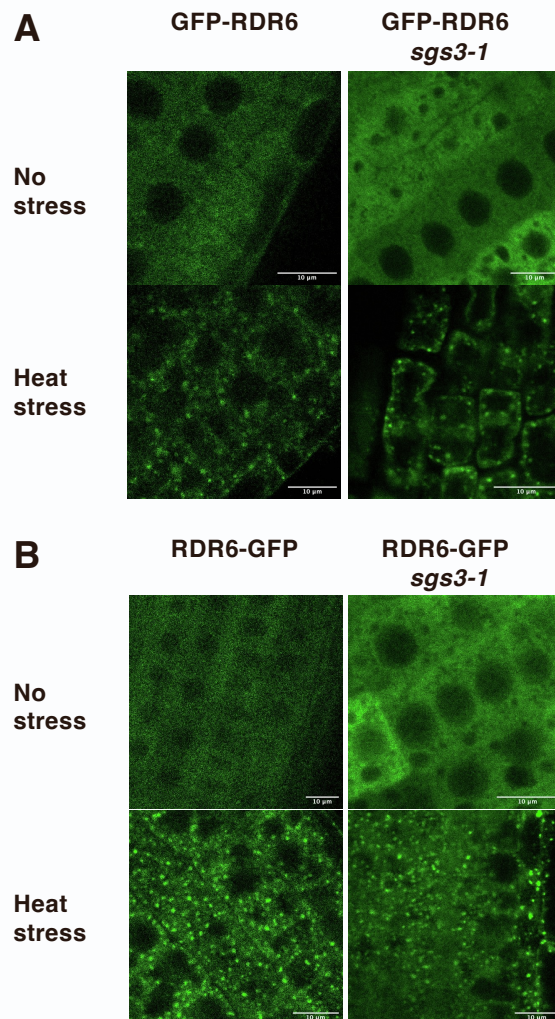

**Fig. S9 HS promotes GFP-RDR6 foci formation even in the absence of SGS3**

**(A)** Representative CLSM imaging of 5 day old Arabidopsis root tip cells of the p35S:GFP-RDR6 in Col-0 or *sgs3-1* transgenic line subjected to 60 min HS at 37°C. Bar = 10 µm. Objective 60X, water immersion.

**(B)** Representative CLSM imaging of 5 day old Arabidopsis root tip cells of the p35S:RDR6-GFP in Col-0 or *sgs3-1* transgenic line subjected to 60 min HS at 37°C. Bar = 10 µm. Objective 60X, water immersion.

Related to Fig. 5H.

| Lines                             | Subcellular localization | References      |
|-----------------------------------|--------------------------|-----------------|
| pAGO1:GFP-AGO1(cs) <i>ago1-36</i> | Nucleus/cytosol/ER       | [1]             |
| pAGO1:GFP-AGO1 <i>ago1-27</i>     | Nucleus/cytosol/ER       | [2]             |
| pAGO1:mCherry-AGO1                | Nucleus/cytosol/ER       | [2]             |
| pUB10:mCherry-RabG3f (R5)         | MVB                      | [3]             |
| pUB10:mCherry-Rha1/RabF2a (R7)    | MVB, tonoplast           | [3]             |
| pUB10:mCherry-VTI12 (R13)         | TGN/EE                   | [3]             |
| pUB10:mCherry-SYP22 (R22)         | Golgi apparatus          | [3]             |
| pRDR6:SGS3-GFP                    | siRNA bodies             | This manuscript |
| p35S:RDR6-GFP <i>sgs3-1</i>       | siRNA bodies             | [4]             |
| p35S:GFP-3Flag                    | Nucleus/cytosol          | This manuscript |
| pDCP1:DCP1-YFP <i>dcp1-3</i>      | P-Bodies                 | [5]             |
| pUB10:DCP5g-GFP <i>dcp5-1</i>     | Cytosol/P-Bodies         | [5]             |
| pUPF1:UPF1g-tagRFP <i>upf1-5</i>  | Cytosol/P-Bodies         | [5]             |
| pPABP2-tRFP-PABP2                 | Cytosol/Stress granules  | [6]             |

**Table S1 List of Arabidopsis transgenic lines used in this study.** Related to Fig. 4 and Fig. S6.

| GENOTYPING PRIMERS                       |                           |                                                                                                               |                                                                                                                    |                                                                                                                    |
|------------------------------------------|---------------------------|---------------------------------------------------------------------------------------------------------------|--------------------------------------------------------------------------------------------------------------------|--------------------------------------------------------------------------------------------------------------------|
| sgs3-14                                  | sgs3-14 LP                | AAATTTGGAGTCCAGAATCGG                                                                                         | Genotyping sgs3-14 SALK_001394                                                                                     |                                                                                                                    |
|                                          | sgs3-14 RP                | CAAAGCATCGGAATCATTCTC                                                                                         | Genotyping sgs3-14 SALK_001394                                                                                     |                                                                                                                    |
| ago1-27                                  | ago1.27_CAPS_F            | CCTGGTGAGACAAGTTTGGATC                                                                                        | Genotyping ago1-27 BanII                                                                                           |                                                                                                                    |
|                                          | ago1.27_CAPS_R            | GGGTGAATCAACTCAGCAGTAGAAC                                                                                     | Genotyping ago1-27                                                                                                 |                                                                                                                    |
| NORTHERN PROBES                          |                           |                                                                                                               |                                                                                                                    |                                                                                                                    |
| ath-miR168                               |                           | TTCCCGACCTGCACCAAGCGA                                                                                         | Oligo probe for LMW Northern blot                                                                                  |                                                                                                                    |
| ath-miR398                               |                           | AAGGGGTGACCTGAGAACACA                                                                                         | Oligo probe for LMW Northern blot                                                                                  |                                                                                                                    |
| ath-miR403                               |                           | CGACTTTGTGCGTGAATCTAA                                                                                         | Oligo probe for LMW Northern blot                                                                                  |                                                                                                                    |
| ath-U6                                   |                           | AGGGGCCATGCTAATCTTCTC                                                                                         | Oligo probe for LMW Northern blot                                                                                  |                                                                                                                    |
| RT-QPCR                                  |                           |                                                                                                               |                                                                                                                    |                                                                                                                    |
| HSFA2 F                                  | AT2G26150 FWD Set 3       | GAA ACG GAG GCT TAC TTC TAC TC                                                                                | qPCR primers                                                                                                       |                                                                                                                    |
|                                          | AT2G26150 REV Set 3       | CTG CAG CGA ACA ACA TTT CC                                                                                    |                                                                                                                    |                                                                                                                    |
| HSFA2 R                                  |                           |                                                                                                               | qPCR primers                                                                                                       |                                                                                                                    |
| AGO1-LP                                  | AT1G48410                 | CGGTGGACAGAAGTGGGAAT                                                                                          | qPCR primers                                                                                                       |                                                                                                                    |
| AGO1-RP                                  | AT1G48410                 | GGTCGAGAAGTGCCTTGAAT                                                                                          | qPCR primers                                                                                                       |                                                                                                                    |
| EXP-LP                                   | At4g26410                 | GAGCTGAAGTGGCTTCAATGAC                                                                                        | qPCR primers                                                                                                       |                                                                                                                    |
| EXP-RP                                   | At4g26411                 | GGTCCGACATACCCATGATCC                                                                                         | qPCR primers                                                                                                       |                                                                                                                    |
| TIP41-LP                                 | AT4G34270                 | GTGAAAAGTGTGGAGAGAAGCAA                                                                                       | qPCR primers                                                                                                       |                                                                                                                    |
| TIP41-RP                                 | AT4G34271                 | TCAACTGGATACCCTTTCGCA                                                                                         | qPCR primers                                                                                                       |                                                                                                                    |
| CLONING PRIMERS                          |                           |                                                                                                               |                                                                                                                    |                                                                                                                    |
| pENTRY-Poly-Q-AGO1                       | AGO1 Poly-Q-fwd           | GGGGACAAGTTTGTACAAAAAAGCA GGCTCCATGGTGAGAAAGAGAAAGAA CG                                                       | cloning of Poly-Q of AGO1 in pDONR221                                                                              |                                                                                                                    |
|                                          | AGO1 Poly-Q-rev           | GGGGACCACCTTTGTACAAGAAAGCT GGGTTTCAATCCTTATCAGGCAGTTC AGCA                                                    |                                                                                                                    |                                                                                                                    |
| pENTRY-R2-AGO1gUTR-L3                    | attB2R_AGO1g_F (MC145)    | GGGGACAGCTTTCTTGACAAAAGTG GCAATGGTGAGAAAAGAGAAGAACGG GGGGACAACCTTTGTATAATAAAGTTG CAGTTAAAGAAAGGATCAAAGTCTGT T | cloning of AGO1 full genomic in pDONR2RP3                                                                          |                                                                                                                    |
|                                          | attB3_AGO1gUTR_R (MC146)  |                                                                                                               |                                                                                                                    |                                                                                                                    |
| pENTRY-R2-PolyQ-ND-L3                    | attB2R_AGO1g_F            | GGGGACAGCTTTCTTGACAAAAGTG GCAATGGTGAGAAAAGAGAAGAACGG GGGGACAACCTTTGTATAATAAAGTTT CACAGATCAGCACGTGCAAC         | cloning of PolyQ-ND of AGO1 in pDONR2RP3                                                                           |                                                                                                                    |
|                                          | attB3NterAGO1-300_rev     |                                                                                                               |                                                                                                                    |                                                                                                                    |
| pRDR6:SGS3g-GFP                          | proSGS2F-HIII             | AAGCTTGCAAACCTGTATATCTGTG G                                                                                   | cloning of RDR6 promoter in pGWB4                                                                                  |                                                                                                                    |
|                                          | proSGS2R-HIII             | AAGCTTTTCTCCTGAAAAAGAAACAT AC                                                                                 |                                                                                                                    |                                                                                                                    |
|                                          | attB2SGS3F                | GGGGACAAGTTTGTACAAAAAAGCA GGCTTAATGAGTCTAGGGCTGGTC GGG GACCACTTTGTACAAGAAAGCTGGG TAATCATCTTCATTGTGAAGGC       | cloning of SGS3 in the modified pGWB4 containing RDR6 promoter                                                     |                                                                                                                    |
| GFP-AGO1Poly-Q domain-6xHis              | AGO int R                 | GCGTCTCAGCCAGAGCCTTCACCT                                                                                      | cloning of GFP-AGO1Poly-Q domain-6xHis                                                                             |                                                                                                                    |
|                                          | AGO1int F                 | GCGTCTCATGGCTCTCGTGAAGC                                                                                       |                                                                                                                    |                                                                                                                    |
|                                          | AGO1-pQ B4 F              | GCCGTCTCGCTCGAGGTATGGTGAG AAAGAGAAGAACG                                                                       |                                                                                                                    |                                                                                                                    |
|                                          | AGO1-pQ B4 R              | GCCGTCTCGCTCACGAATCCTTATCA GGCAGTTCAGCA                                                                       |                                                                                                                    |                                                                                                                    |
| p35S:GFP-3Flag                           | 612PacAscF                | AGCTATTAATTAACCATGGGGCGCG CC                                                                                  | modification of the multiple cloning site of the Pily vector by insertion of annealed oligos to create Pily-PA-7Ha |                                                                                                                    |
|                                          | 612PacAscR                | GGCGCGCCCATGGTTAATTAAT                                                                                        |                                                                                                                    |                                                                                                                    |
|                                          | 612FlagF                  |                                                                                                               | CTAGAGGAGATTACAAGGATGATGA CGATAAGGCAGGAGATTACAAGGAT GATGACGATAAAGGCAGGAGATTACA AGGATGATGACGATAAAGTGAG              | cloning of 3Flag sequence by using annealed oligonucleotides and cloning into Pily-PA-7Ha to obtain Pily-PA-3xFlag |
|                                          |                           |                                                                                                               | AATTCTCACTTATCGTCATCATCCTT GTAATCCCTGCCTTATCGTCATCAT CTTGTAATCTCCTGCCTTATCGTCAT CATCCTTGTAAATCTCCT                 |                                                                                                                    |
|                                          | 612FlagR                  | GCTAGCGGCGTGAGCAAGGGCGAG GAGCTGTTCA                                                                           | cloning of eGFP sequence in Pily-PA-3xFlag to create p35S:eGFP-3xFlag                                              |                                                                                                                    |
|                                          | eGFPhelF                  | GCTAGCAGCACCTCCCTGTACAGC TCGTCCATGCCGAGA                                                                      |                                                                                                                    |                                                                                                                    |
| eGFPhelR                                 |                           |                                                                                                               |                                                                                                                    |                                                                                                                    |
| ssRNA and dsRNA GFP sequence preparation | A349_IVTGFP118bp_T7pro_fw | GAAATTAATACGACTCACTATAGGGA TAATGTAACGGCCACAAGTTCAG                                                            | ssRNA and dsRNA GFP substrate preparation                                                                          |                                                                                                                    |
|                                          | A347_IVTGFP118bp_rv       | GGCCAGGGCACGGGCAG                                                                                             |                                                                                                                    |                                                                                                                    |
|                                          | A346_IVTGFP118bp_fw       | GTAACGGCCACAAGTTCAG                                                                                           |                                                                                                                    |                                                                                                                    |
|                                          | A348_IVTGFP118bp_T7pro_rv | GTAACGGCCACAAGTTCAG                                                                                           |                                                                                                                    |                                                                                                                    |
|                                          |                           | GAAATTAATACGACTCACTATAGGGA TAATGGCCAGGGCACGGGCAG                                                              |                                                                                                                    |                                                                                                                    |

**Table S3 List of primers for genotyping, RT-qPCR, cloning and Northern probes. Related to STAR Methods.**

|                        |                  | Raw reads | Clean reads |       | Mapping reads |       |
|------------------------|------------------|-----------|-------------|-------|---------------|-------|
| RNAseq                 | Control Rep 1    | 28785784  |             |       | 18966953      | 65,89 |
|                        | Control Rep 2    | 18884030  |             |       | 16240266      | 86    |
|                        | Control Rep 3    | 17617171  |             |       | 15104962      | 85,74 |
|                        | Heat Shock Rep 1 | 25285035  |             |       | 18688169      | 73,91 |
|                        | Heat Shock Rep 2 | 16111873  |             |       | 13372855      | 83    |
|                        | Heat Shock Rep 3 | 15690800  |             |       | 14007177      | 89,27 |
|                        | Recovery Rep 1   | 21212133  |             |       | 16066070      | 75,74 |
|                        | Recovery Rep 2   | 14122783  |             |       | 11969059      | 84,75 |
|                        | Recovery Rep 3   | 18118377  |             |       | 15214001      | 83,97 |
| small RNAseq Total RNA | Control Rep 1    | 21081929  | 20725739    | 98,31 | 16248140      | 77,07 |
|                        | Control Rep 2    | 35352189  | 33937811    | 96,00 | 25054967      | 70,87 |
|                        | Control Rep 3    | 19663490  | 18831492    | 95,77 | 15795316      | 80,33 |
|                        | Heat Shock Rep 1 | 29623804  | 29259969    | 98,77 | 25209609      | 85,10 |
|                        | Heat Shock Rep 2 | 27385129  | 26161239    | 95,53 | 22211581      | 81,11 |
|                        | Heat Shock Rep 3 | 20156616  | 19271380    | 95,61 | 17121616      | 84,94 |
|                        | Recovery Rep 1   | 19928665  | 19425683    | 97,48 | 14580302      | 73,16 |
|                        | Recovery Rep 2   | 22079561  | 21531257    | 97,52 | 17480233      | 79,17 |
|                        | Recovery Rep 3   | 17345155  | 16344099    | 94,23 | 14050128      | 81,00 |
| small RNAseq AGO1-IP   | Control Rep 1    | 15981581  | 15346379    | 96,03 | 12596123      | 78,82 |
|                        | Control Rep 2    | 9650259   | 9205516     | 95,39 | 6806585       | 70,53 |
|                        | Control Rep 3    | 7004906   | 6917808     | 98,76 | 5812376       | 82,98 |
|                        | Heat Shock Rep 1 | 13867414  | 13716810    | 98,91 | 11757092      | 84,78 |
|                        | Heat Shock Rep 2 | 14109532  | 13556181    | 96,08 | 9358801       | 66,33 |
|                        | Heat Shock Rep 3 | 3143624   | 3032783     | 96,47 | 2461577       | 78,30 |
|                        | Recovery Rep 1   | 11073787  | 10197218    | 92,08 | 7766802       | 70,14 |
|                        | Recovery Rep 2   | 10009882  | 9662175     | 96,53 | 8043758       | 80,36 |
|                        | Recovery Rep 3   | 9162062   | 8942838     | 97,61 | 7556160       | 82,47 |
| nanoPARE               | Control Rep 1    | 11290888  |             |       |               |       |
|                        | Control Rep 2    | 12303757  |             |       |               |       |
|                        | Control Rep 3    | 12716356  |             |       |               |       |
|                        | Heat Shock Rep 1 | 14079315  |             |       |               |       |
|                        | Heat Shock Rep 2 | 18091852  |             |       |               |       |
|                        | Heat Shock Rep 3 | 12246794  |             |       |               |       |
|                        | Recovery Rep 1   | 16741564  |             |       |               |       |
|                        | Recovery Rep 2   | 16278404  |             |       |               |       |
|                        | Recovery Rep 3   | 18846159  |             |       |               |       |

**Table S4 Summary table for all sequencing experiments.** Related to Fig 4 and Fig. S6.

## References

- [1] Derrien, B., Baumberger, N., Schepetilnikov, M., Viotti, C., De Cillia, J., Ziegler-Graff, V., Isono, E., Schumacher, K., and Genschik, P. (2012). Degradation of the antiviral component ARGONAUTE1 by the autophagy pathway. *Proc. Natl. Acad. Sci.* 109, 15942–15946. [10.1073/pnas.1209487109](https://doi.org/10.1073/pnas.1209487109).
- [2] Bologna, N.G., Iselin, R., Abriata, L.A., Sarazin, A., Pumplun, N., Jay, F., Grentzinger, T., Dal Peraro, M., and Voinnet, O. (2018). Nucleo-cytosolic Shuttling of ARGONAUTE1 Prompts a Revised Model of the Plant MicroRNA Pathway. *Mol. Cell* 69, 709-719.e5. [10.1016/j.molcel.2018.01.007](https://doi.org/10.1016/j.molcel.2018.01.007).
- [3] Geldner, N., Dénervaud-Tendon, V., Hyman, D.L., Mayer, U., Stierhof, Y.D., and Chory, J. (2009). Rapid, combinatorial analysis of membrane compartments in intact plants with a multicolor marker set. *Plant J.* 59, 169–178. [10.1111/j.1365-313X.2009.03851.x](https://doi.org/10.1111/j.1365-313X.2009.03851.x).
- [4] Moreno, A.B., De Alba, A.E.M., Bardou, F., Crespi, M.D., Vaucheret, H., Maizel, A., and Mallory, A.C. (2013). Cytoplasmic and nuclear quality control and turnover of single-stranded RNA modulate post-transcriptional gene silencing in plants. *Nucleic Acids Res.* 41, 4699–4708. [10.1093/nar/gkt152](https://doi.org/10.1093/nar/gkt152).
- [5] Chicois, C., Scheer, H., Garcia, S., Zuber, H., Mutterer, J., Chicher, J., Hammann, P., Gagliardi, D., and Garcia, D. (2018). The UPF1 interactome reveals interaction networks between RNA degradation and translation repression factors in Arabidopsis. *Plant J.* 96, 119–132. [10.1111/tpj.14022](https://doi.org/10.1111/tpj.14022).
- [6] Merret, R., Carpentier, M.C., Favory, J.J., Picart, C., Descombin, J., Bousquet-Antonelli, C., Tillard, P., Lejay, L., Deragon, J.M., and Charng, Y.Y. (2017). Heat shock protein HSP101 affects the release of ribosomal protein mRNAs for recovery after heat shock. *Plant Physiol.* 174, 1216–1225. [10.1104/pp.17.00269](https://doi.org/10.1104/pp.17.00269).
